# Supplementary material
Source: PubMed Central journal article supplement (PMC11151142)
Supplement: jama-e244819-s002.pdf [file jama-e244819-s002.pdf]

Wu F, Jacobs DR Jr, Daniels SR, et al. Non-high-density lipoprotein cholesterol levels from childhood to adulthood and cardiovascular disease events. *JAMA*. Published online April 12, 2024. doi:10.1001/jama.2024.4819

## Data Sharing Statement

### Data

**Data available:** Yes

**Data types:** Deidentified participant data

**How to access data:** All deidentified participant data and data dictionary are available from the corresponding author upon reasonable request and agreement of the original investigators (email: [Feitong.Wu@baker.edu.au](mailto:Feitong.Wu@baker.edu.au) or [Costan.Magnussen@baker.edu.au](mailto:Costan.Magnussen@baker.edu.au)).

**When available:** With publication

### Supporting Documents

**Document types:** None

### Additional Information

**Who can access the data:** Researchers whose proposed use of the data has been approved.

**Types of analyses:** Any analysis.

**Mechanisms of data availability:** After approval of a proposal.
